# Supplementary material for: Fission yeast Myo51 is a meiotic spindle pole body component with discrete roles during cell fusion and spore formation
Source: Oxford University Press journal article supplement (doi:10.1242/jcs.055202), 2009-11-04
Supplement: jcs055202-sup-055202-tables1.pdf [file jcs055202-sup-055202-tables1.pdf]

**Table S1.** Strains used in the study.

| Strain No. | Genotype                                                                                      | Reference                |
|------------|-----------------------------------------------------------------------------------------------|--------------------------|
|            | $h^-$ <i>myo51::ura4 myo52::ura4 leu1-32 ura4-d18</i>                                         | (Win et al., 2001)       |
|            | $h^+$ <i>myo51::ura4 myo52::ura4 leu1-32 ura4-d18</i>                                         | (Win et al., 2001)       |
| 135        | $h^{90}$ <i>myo51-gfp:kanMX6 leu1-32 ura4-d18</i>                                             | This study               |
| 136        | $h^{90}$ <i>myo52-gfp:kanMX6 leu1-32 ura4-d18</i>                                             | This study               |
| 426        | $h^{90}$ <i>myo51::ura4 leu1-32 ura4-d18</i>                                                  | This study               |
| 668        | $h^{90}$ <i>leu1::nmt41(HcRed1)<sub>4</sub>-myo51:ura4 ura4-d18</i>                           | This study               |
| 672        | $h^{90}$ <i>leu1::nmt41(HcRed1)<sub>4</sub>-myo51:ura4 nmt81gfp-atb2:kanMX6</i>               | This study               |
| 681        | $h^{90}$ <i>leu1::nmt41(HcRed1)<sub>4</sub>-myo51:ura4 pcpl1-gfp:kanMX6 ura4-d18</i>          | This study               |
| 731        | $h^{90}$ <i>fus1::LEU2 leu1-32 ura4-d18</i>                                                   | (Petersen et al., 1998c) |
| 732        | <i>mal2-gfp:kanMX6 ura4-d18 leu1-32 ade6-M210</i>                                             | (Jin et al., 2002)       |
| 739        | $h^{90}$ <i>sid4-tomato:hphMX6 ura4-d18 leu1-32</i>                                           | (Tanaka et al., 2005)    |
| 749        | $h^{90}$ <i>leu1::nmt41gfp-myo51:ura4 ura4-d18</i>                                            | This study               |
| 752        | $h^{90}$ <i>myo51-cherry:kanMX6 leu1-32 ura4-d18 his2-d1</i>                                  | This study               |
| 753        | $h^{90}$ <i>myo51-gfp:kanMX6 myo52::ura4 leu1-32 ura4-d18</i>                                 | This study               |
| 754        | $h^{90}$ <i>myo52-gfp:kanMX6 myo51::ura4 leu1-32 ura4-d18</i>                                 | This study               |
| 755        | $h^{90}$ <i>leu1::nmt41(HcRed1)<sub>4</sub>-myo51:ura4 mal2-gfp:kanMX6 ura4-d18</i>           | This study               |
| 763        | $h^{90}$ <i>myo51-mCherry:kanMX6 leu1::nmt81gfp-act1:ura4 ura4-d18</i>                        | This study               |
| 774        | $h^{90}$ <i>mes1::LEU2 leu1-32 ura4-d18</i>                                                   | (Kishida et al., 1994)   |
| 779        | $h^{90}$ <i>leu1::nmt41gfp-myo51tail:ura4 sid4-tdTomato:hphMX6 ura4-d18</i>                   | This study               |
| 803        | $h^{90}$ <i>fus1::LEU2 myo51-gfp:kanMX6 leu1-32 ura4-d18</i>                                  | This study               |
| 833        | $h^{90}$ <i>leu1::nmt41gfp-myo51tail:ura4 myo51-cherry:kanMX6 ura4-d18</i>                    | This study               |
| 843        | $h^{90}$ <i>myo51-gfp:kanMX6 sid4-tdTomato:hphMX6 ura4-d18 leu1-32</i>                        | This study               |
| 873        | $h^{90}$ <i>myo51-gfp:kanMX6 sid4-tdTomato:hphMX6 mes1::LEU2 leu1-32 ura4-d18</i>             | This study               |
| 1053       | $h^{90}$ <i>myo51::ura4 leu1-32 ura4-d18 pREP1myo52tail</i>                                   | This study               |
| 1150       | $h^{90}$ <i>cdc11-132 myo52-gfp leu1-32 ura4-d18</i>                                          | This study               |
| 1477       | $h^{90}$ <i>myo51::ura4 sid4-tdTomato:hphMX6 dlc2-gfp:kanMX6 leu1-32 ura4-d18</i>             | This study               |
| 1478       | $h^{90}$ <i>sid4-tdTomato:hphMX6 dlc2-gfp:kanMX6 leu1-32 ura4-d18 pREP41myo51<sup>+</sup></i> | This study               |
